# Supplementary material
Source: Royal Society of Chemistry journal article supplement (doi:10.1039/d6py00117c)

Figure S1: Mass spectra of the main peaks.

Ret. time: 10.01 min

2-Tritriacontanone

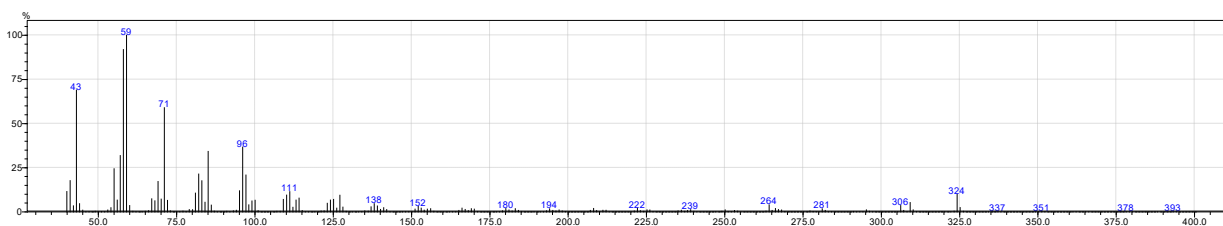

Ret. time: 10.45 min

2-Tridecanone

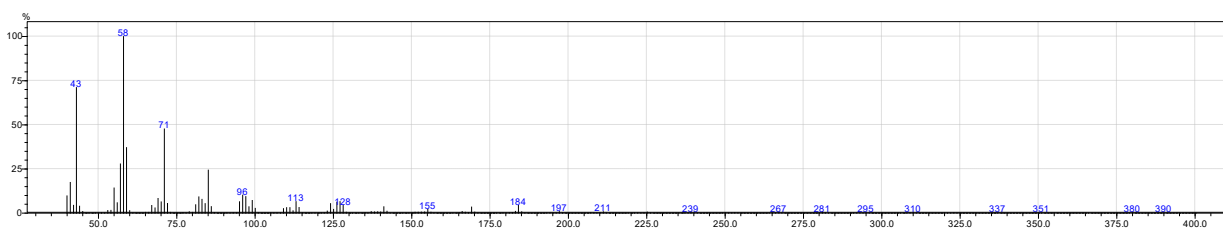

Ret. Time: 12.02 min

2-Pentadecanone

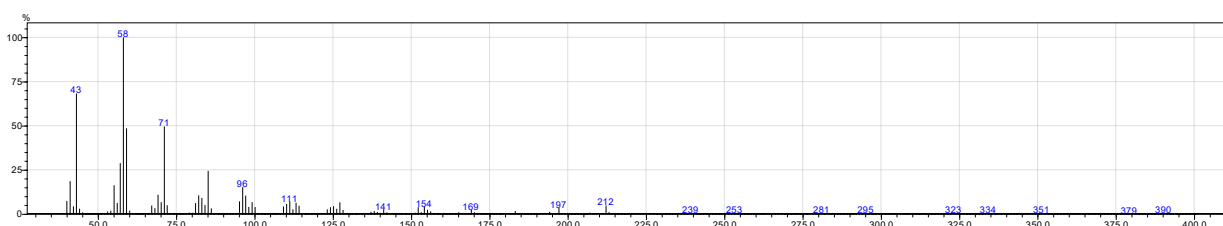

Ret. time: 13.57 min

2-Hexadecanone

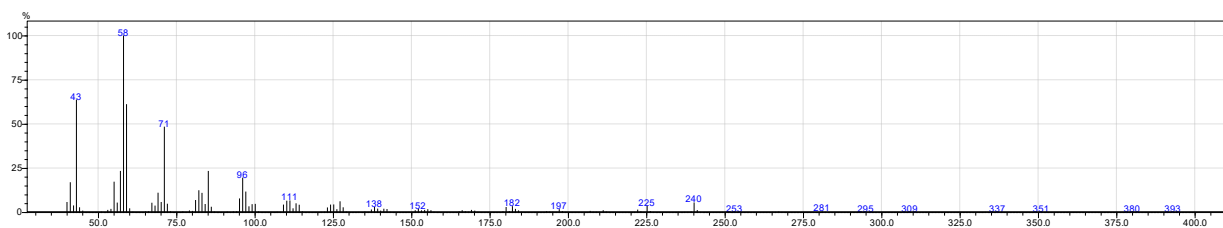

Ret. time: 15.42 min

2-Nonadecanone

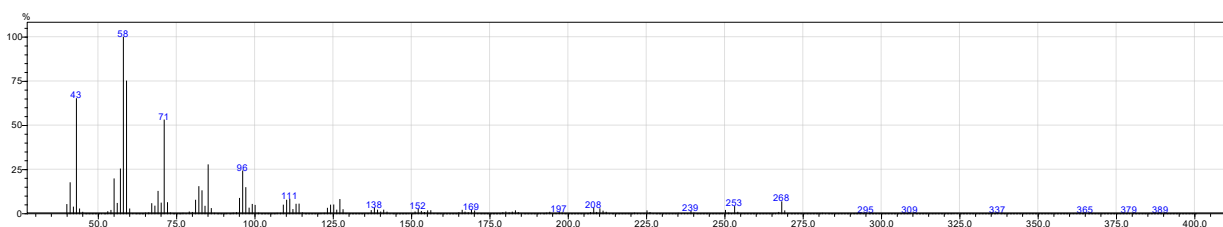

Ret. time: 17.79 min

2-Tritriacontanone

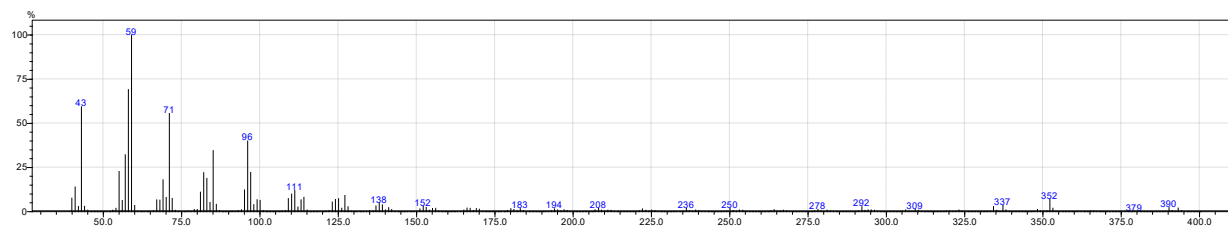

Ret. time: 18.10 min

2-Pentatriacontanone

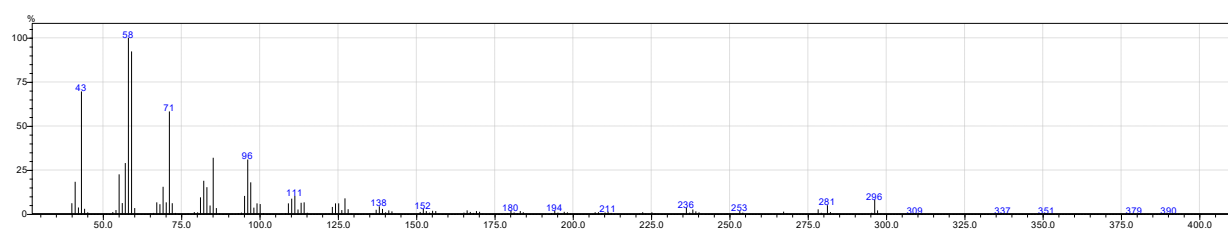

Figure S2: Mass spectra of the main peaks.

Ret. time: 10.00 min

2-Tritriacontanone

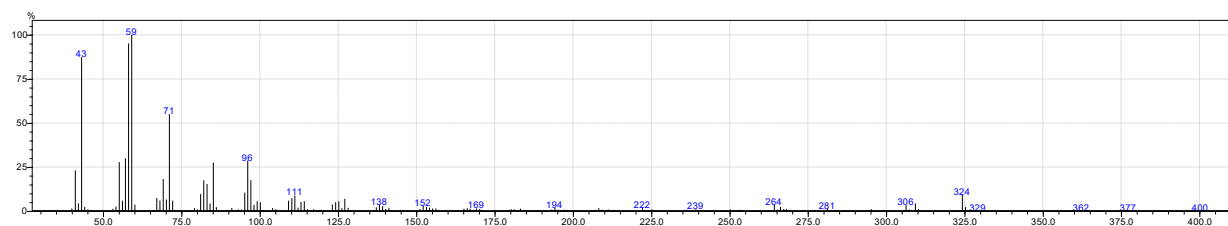

Ret. time: 10.45 min

2-Dodecanone

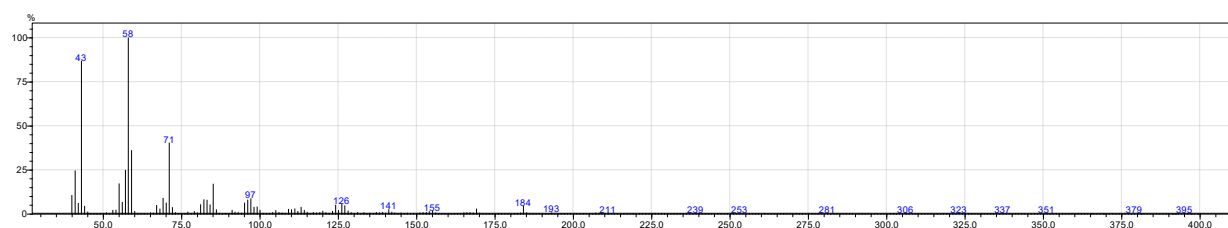

Ret. time: 12.01 min

2-Nonadecanone

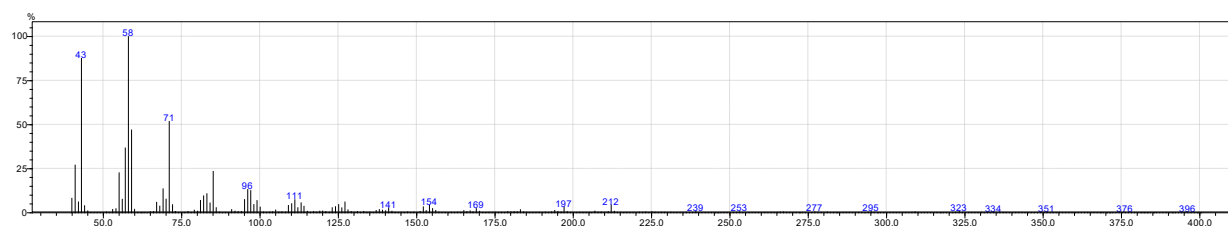

Ret. time: 13.58 min

2-Hexadecanone

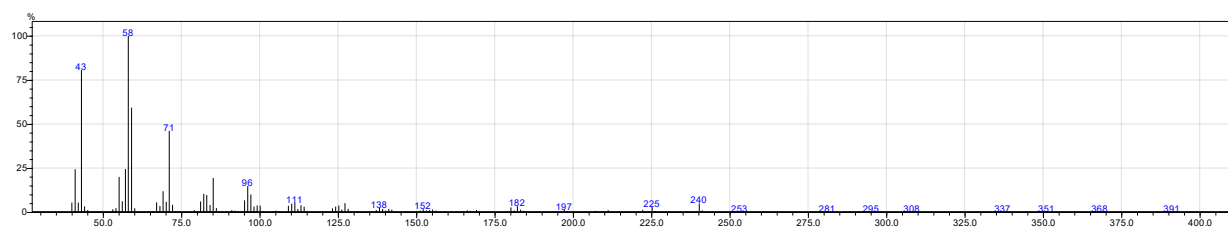

Ret. time: 15.41 min

2-Nonadecanone

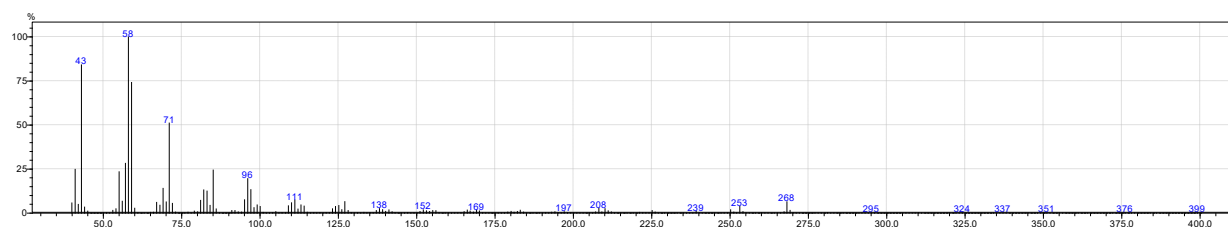

Ret. time: 17.82 min

2-Pentatriacontanone

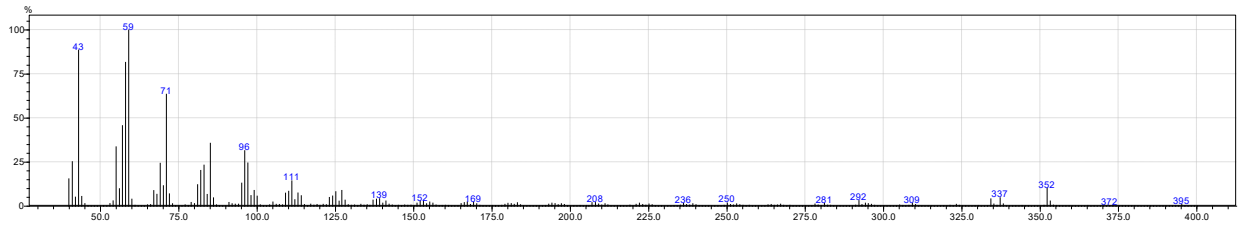

Ret. time: 18.10 min

2-Nonadecanone

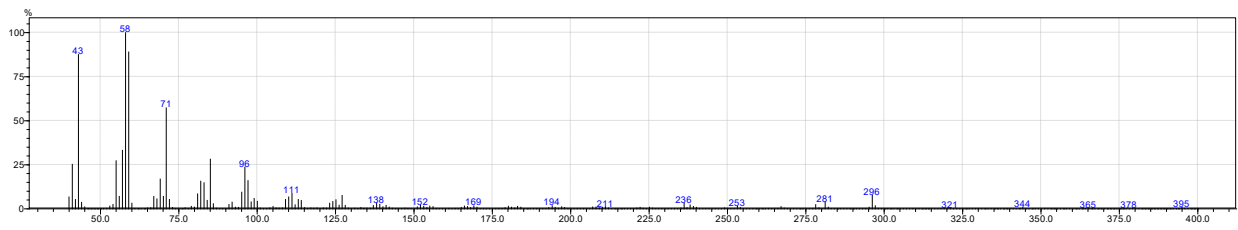

Ret. time: 19.73 min

2-Methylhexacosane

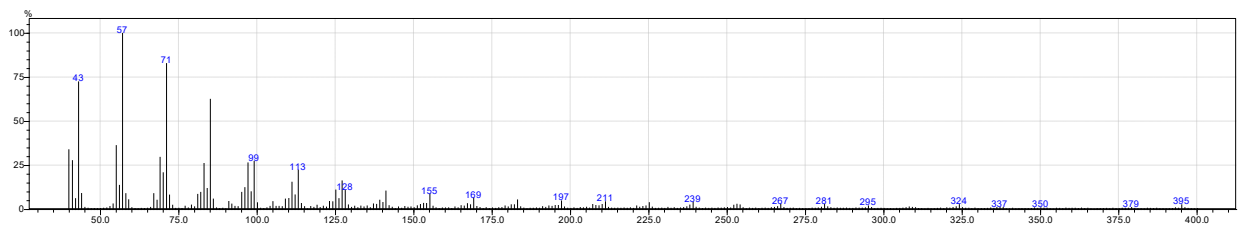

Figure S3: Mass spectra of the main peaks.

Ret. time: 6.73 min

Phenol

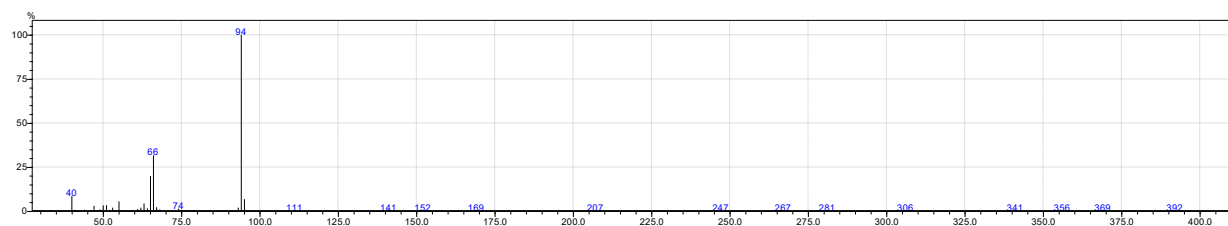

Ret. time: 10.10 min

2-Tritriacontanone

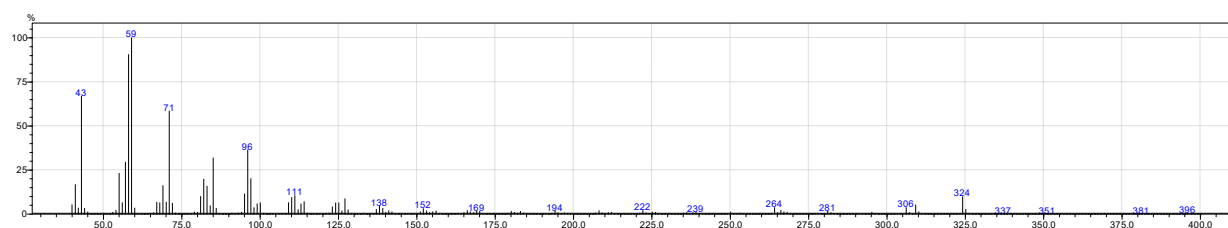

Ret. time: 12.03 min

2-Heptadecanone

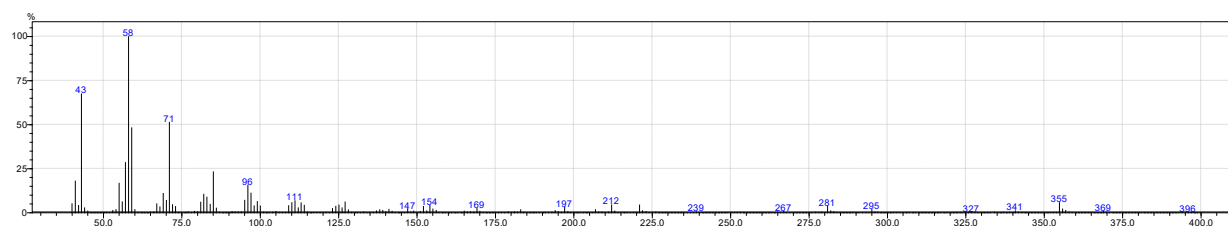

Ret. time: 13.58 min

2-Hexadecanone

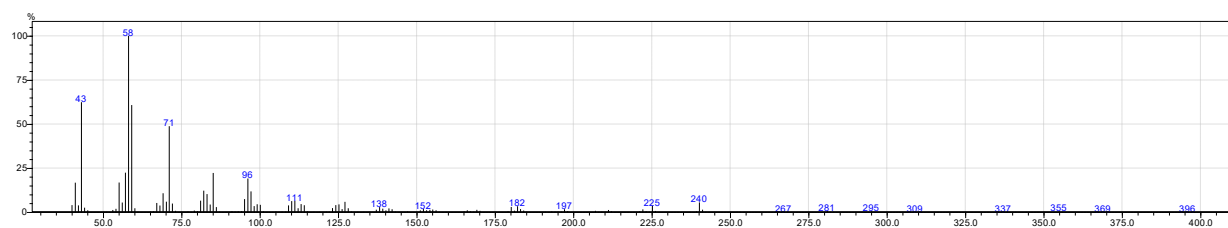

Ret. time: 15.44 min

2-Pentatriacontanone

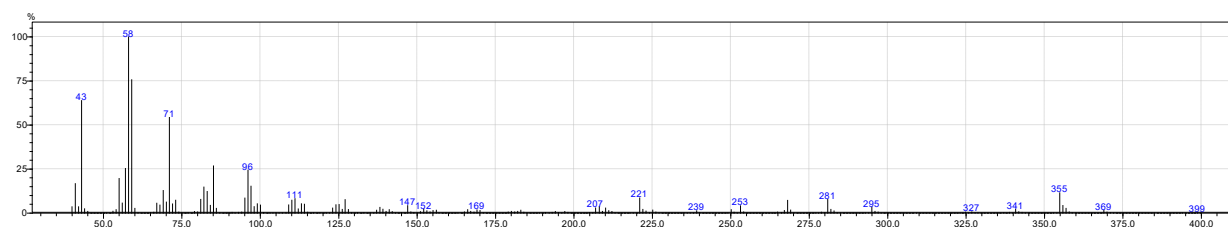

Ret. time: 17.95 min

2-Tritriacontanone

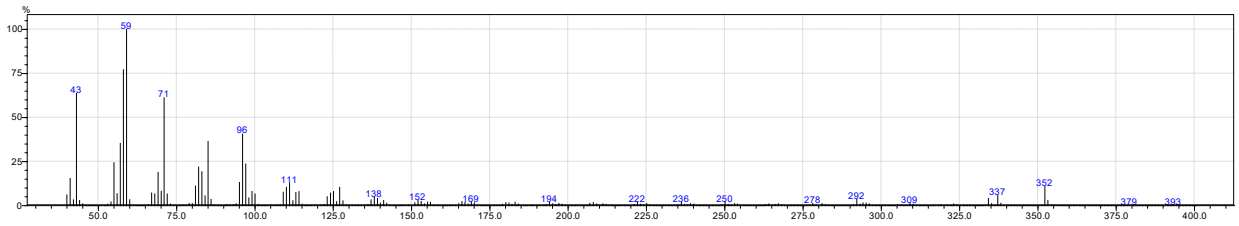

Ret. time: 18.13 min

2-Tritriacontanone

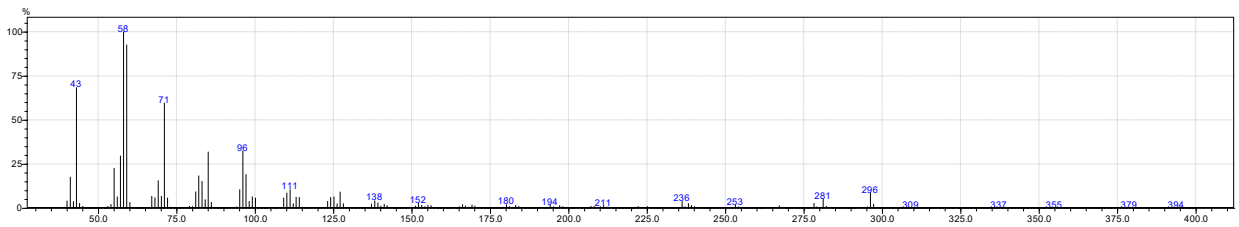

Ret. time: 19.79 min

Tetrapentacontane

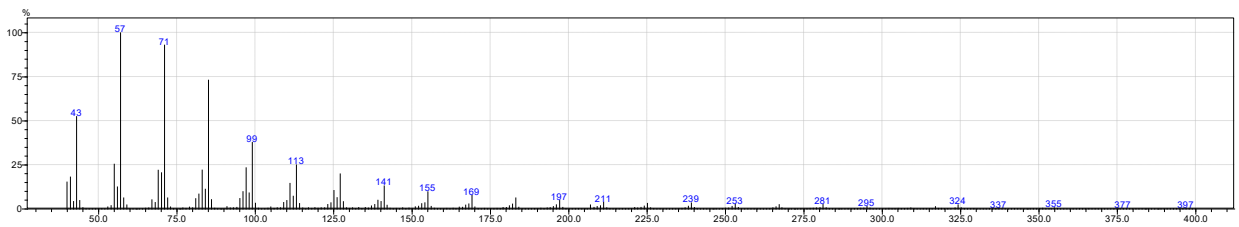

Figure S4: Mass spectra of the main peaks.

Ret. time: 10.45 min

2-Dodecanone

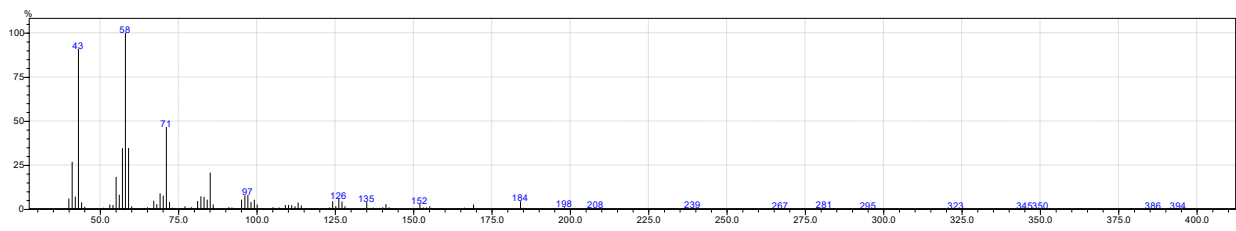

Ret. time: 11.25 min

Hexacosane

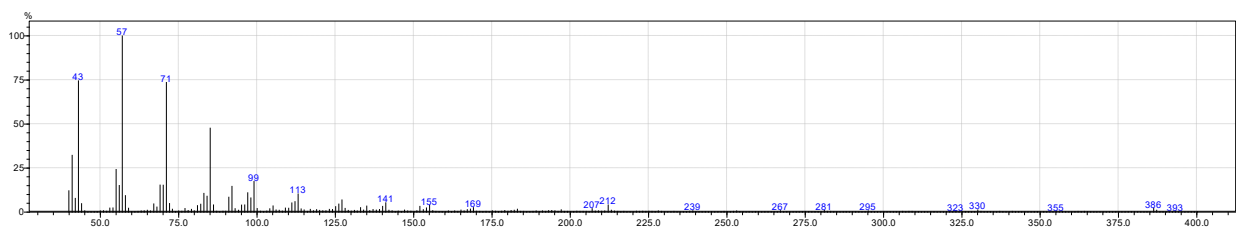

Ret. time 12.03 min

2-Nonadecanone

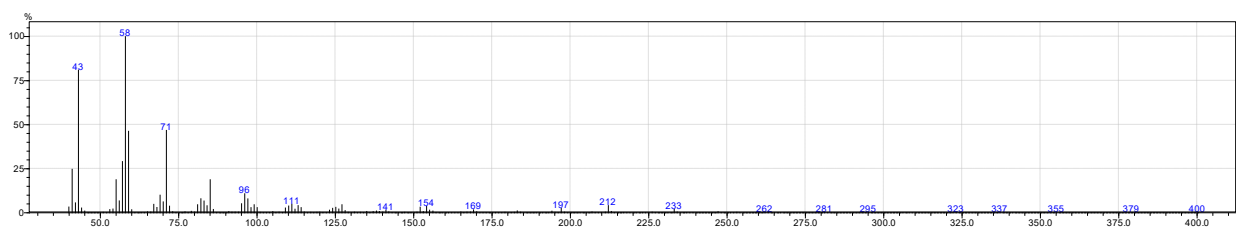

Ret. time: 12.75 min

Eicosane

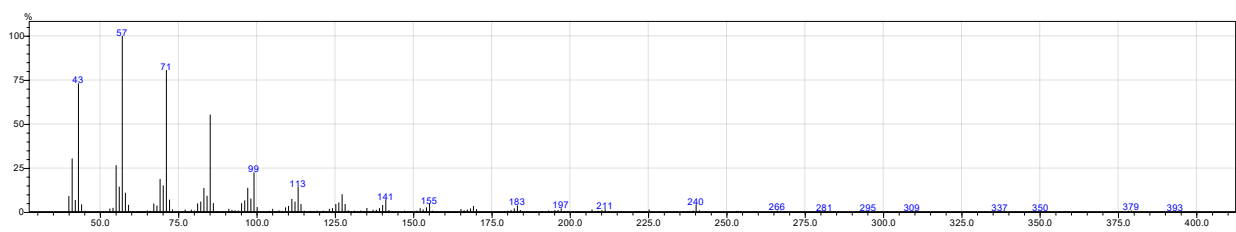

Ret. time: 13.57 min

2-Hexadecanone

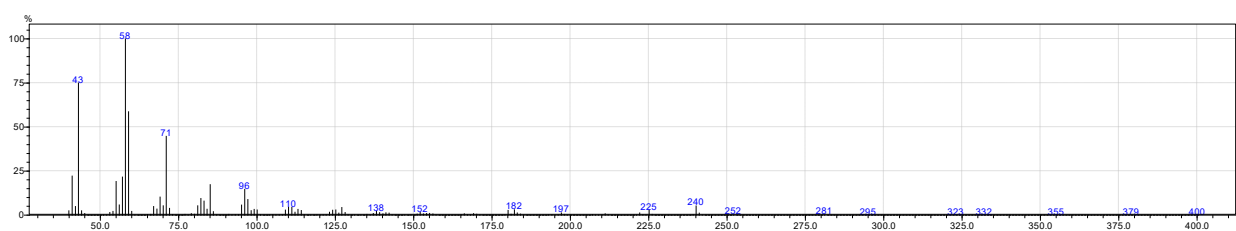

Ret. time: 15.42 min

2-Nonadecanone

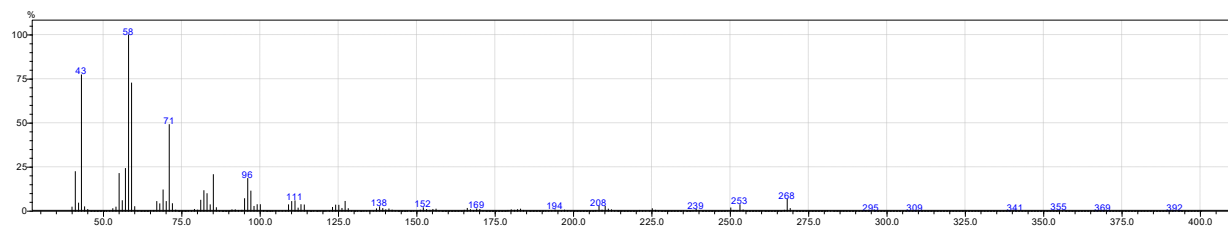

Ret. time: 18.10 min

2-Nonadecanone

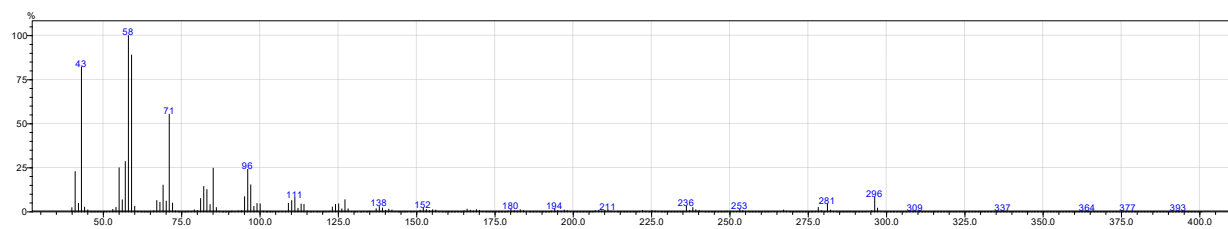

Ret. time: 19.73 min

2-Methylpentacosane

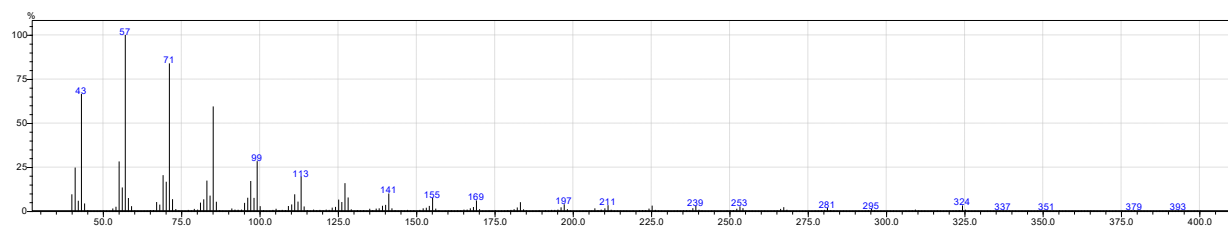

Figure S5: Mass spectra of the main peaks.

Ret. time: 10.00 min

2-Tritriacontanone

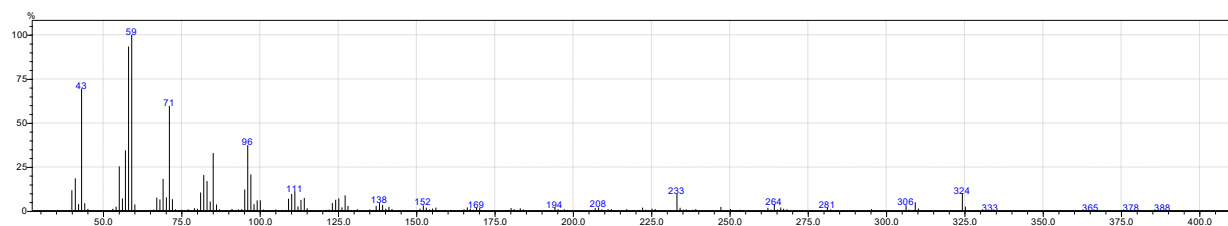

Ret. time: 10.45 min

2-Dodecanone

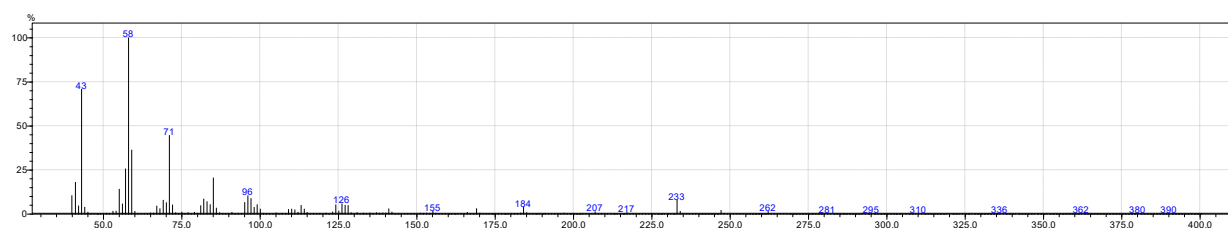

Ret. time: 12.03 min

2-Heptadecanone

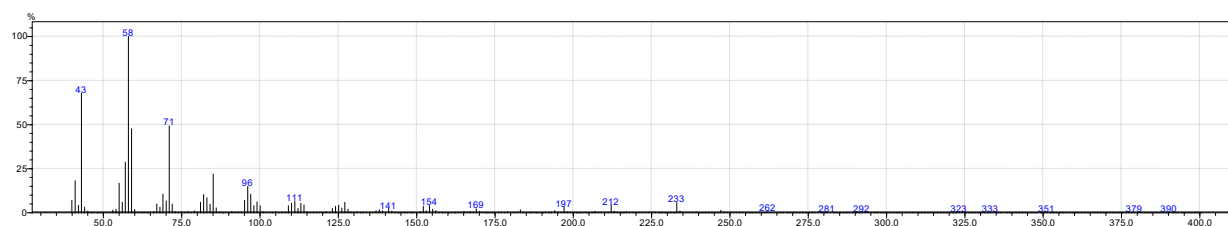

Ret. time: 13.55 min

2-Hexadecanone

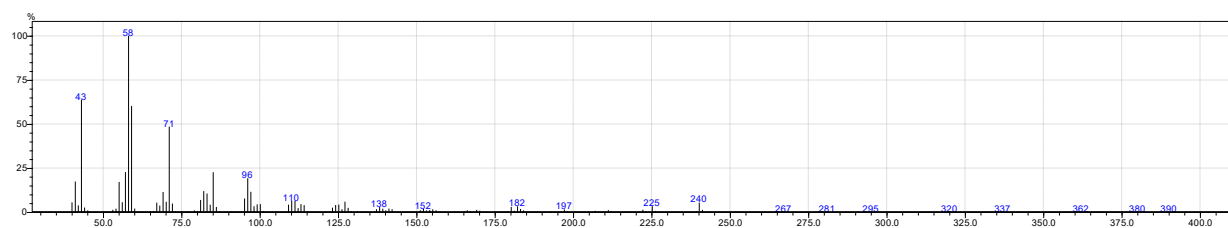

Ret. time: 15.43 min

Methyl n-hexadecyl ketone

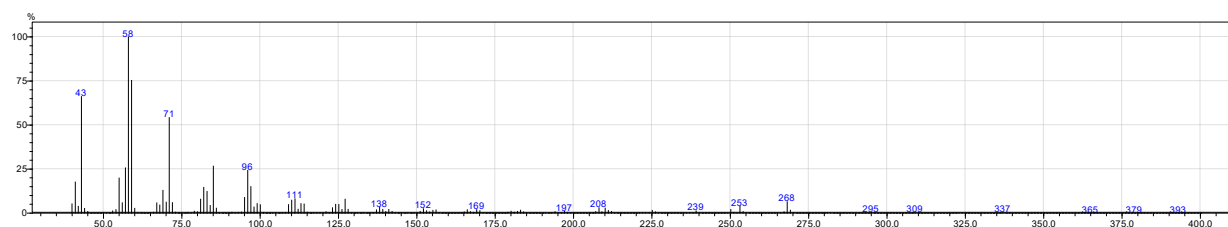

Ret. time: 17.84 min

2-Pentatriacontanone

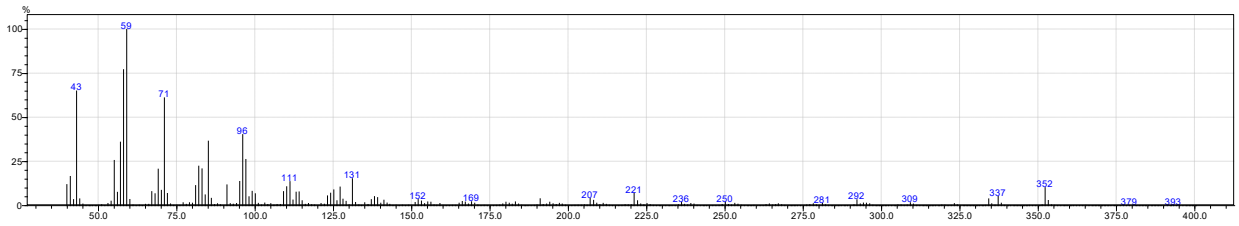

Ret. time: 18.11 min

2-Pentatriacontanone

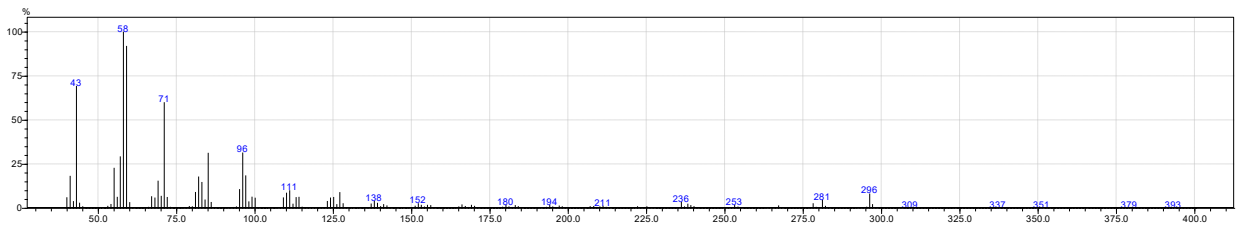

Supplement: d6py00117c2.pdf [file d6py00117c2.pdf]
